# Supplementary material for: Impact of Different Oseltamivir Regimens on Treating Influenza A Virus Infection and Resistance Emergence: Insights from a Modelling Study
Source: PLoS Comput Biol. 2014 Apr 17;10(4):e1003568. doi: 10.1371/journal.pcbi.1003568 (PMC3990489; doi:10.1371/journal.pcbi.1003568)
Supplement: Text S2 — Population approach. (DOCX) [file pcbi.1003568.s010.docx]

**Text S2: Population approach**

The population approach is a method commonly used in pharmacokinetics modeling to take into account several levels of variability, such as the inter-individual variability [[1](#_ENREF_1)]. In the population approach, each model coefficient can be decomposed into a “population” parameter (a fixed effect) and an inter-individual variability (IIV) parameter (a random effect).

Let be the vector of the observations of subject , with varying from 1 to. Let be a function describing the phenomenon to model (here our structural equations), depending nonlinearly from , the vector of the p parameters of the subject . Suppose that represents the vector of times at which samples are collected from subject , . The statistical model for the subject is then:

where is the vector of the residual errors which is the part of the observations unexplained by the model . We will assume that these errors are independent from one observation to another and that their distribution is Gaussian. and are two parameters characterizing the error model variance.

In the population approach, the structural equation model is common to all the subjects, but the vector of parameter for the subject may vary from one subject to another. The vector of parameter for the subject can be expressed as a second level model.

Individual parameters were simulated as , where i is the individual parameter for the subject , pop and are the population parameter and the random effectand were drawn from lognormal distributions and respectively, where and were the mean and variance estimated in previous works [[2](#_ENREF_2),[3](#_ENREF_3)]. was drawn from a Gaussian distribution , where represents the inter-individual variability of the parameter .

**References**

1. Sheiner LB, Steimer JL (2000) Pharmacokinetic/pharmacodynamic modeling in drug development. Annu Rev Pharmacol Toxicol 40: 67-95.

2. Canini L, Carrat F (2011) Population modeling of influenza A/H1N1 virus kinetics and symptom dynamics. J Virol 85: 2764-2770.

3. Wattanagoon Y, Stepniewska K, Lindegardh N, Pukrittayakamee S, Silachamroon U, et al. (2009) Pharmacokinetics of high-dose oseltamivir in healthy volunteers. Antimicrob Agents Chemother 53: 945-952.
